# Supplementary material for: Improvement of the electron collection efficiency in porous hematite using a thin iron oxide underlayer: towards efficient all-iron based photoelectrodes
Source: Royal Society of Chemistry journal article supplement (doi:10.1039/c5cp04152j), 2015-01-01
Supplement: c5cp04152j1.pdf [file c5cp04152j1.pdf]

## Electronic Supplementary Information

# Improvement of the Electron Collection Efficiency in Porous Hematite Using a Thin Iron Oxide Underlayer: Towards Efficient All-Iron Based Photoelectrodes.

*Nicola Dalle Carbonare,<sup>a</sup> Stefano Carli,<sup>a</sup> Roberto Argazzi,<sup>b</sup> Michele Orlandi,<sup>c</sup> Nicola Bazzanella,<sup>c</sup> Antonio Miotello,<sup>c</sup> Stefano Caramori,<sup>\*,a</sup> Carlo A. Bignozzi<sup>\*,a</sup>*

<sup>a</sup> Department of Chemical and Pharmaceutical Sciences, University of Ferrara, via Fossato di Mortara 17-27, 44121 Ferrara, Italy

<sup>b</sup> CNR/ISOF c/o Department of Chemical and Pharmaceutical Sciences, University of Ferrara, via Fossato di Mortara 17-27, 44121 Ferrara, Italy

<sup>c</sup> Department of Physics, University of Trento, via Sommarive 14, I-38123 Povo, Trento, Italy

## Table of contents

|            |                                                                                                                                                | Page |
|------------|------------------------------------------------------------------------------------------------------------------------------------------------|------|
| Figure S1  | Top-view images of HTL-1-4 samples                                                                                                             | S3   |
| Table S1   | Reproducibility of the thickness measurement with cross-section SEM analysis of HTL samples                                                    | S3   |
| Figure S2  | XRD of iron oxide powders at different annealing treatment                                                                                     | S4   |
| Figure S3  | Cross-sectional SEM image of MPH deposited on HTL-3 and annealed at 800°C                                                                      | S4   |
| Figure S4  | Top-view SEM images of MPH deposited over FTO and annealed at 550 °C and 800 °C                                                                | S5   |
| Figure S5  | EDS analysis of MPH sample before and after 800°C annealing                                                                                    | S6   |
| Figure S6  | Micro-Raman spectra of HTL-1-4 samples and bare FTO                                                                                            | S7   |
| Figure S7  | XRD of MPH and HTL-3-MPH samples after 800°C annealing                                                                                         | S8   |
| Figure S8  | Background subtracted absorbance (390 nm) versus the number of spin coating runs (1-4) adopted to obtain HTL-1-4 samples                       | S8   |
| Figure S9  | Cross sectional view of MPH deposited on FTO and annealed at 800 °C                                                                            | S9   |
| Figure S10 | Chronoamperometry of MPH, HTL-3-MPH and HTL-3-MPH+Fe-OEC                                                                                       | S9   |
| Figure S11 | Average <i>J-V</i> response of MPH, HTL-3-MPH and HTL-3-MPH+Fe-OEC                                                                             | S10  |
| Figure S12 | <i>JV</i> curves of HTL-3 sample functionalized with Fe-OEC.                                                                                   | S10  |
| Figure S13 | IPCE spectra of HTL-3-MPH and the sum of the separated response of the two layers                                                              | S11  |
| Figure S14 | Photovoltage decays of MPH, HTL-3 and HTL-3-MPH samples recorded in a KOH solution of $K_4[Fe(CN)_6]/K_3[Fe(CN)_6]$ at different concentration | S12  |
| Figure S15 | Nyquist plot (0 V vs SCE) of MPH, HTL-3 and HTL-3-MPH with and without Fe-OEC                                                                  | S13  |
| Figure S16 | Derivative of the <i>J-V</i> curve compared to $R_{tot}^{-1}$ for HTL-3, MPH, HTL-3-MPH and HTL-3-MPH with Fe-OEC samples                      | S14  |
| Figure S17 | Mixed plot of <i>J-V</i> curve, $R_3$ and CPE2 values obtained for HTL-3, MPH, HTL-3-MPH and HTL-3-MPH with Fe-OEC under AM 1.5G illumination  | S15  |
| Figure S18 | Mott-Schottky plot of MPH, HTL-3 and HTL-3-MPH samples                                                                                         | S16  |
| Figure S19 | Photoluminescence spectra of MPH and HTL-3-MPH.                                                                                                | S17  |

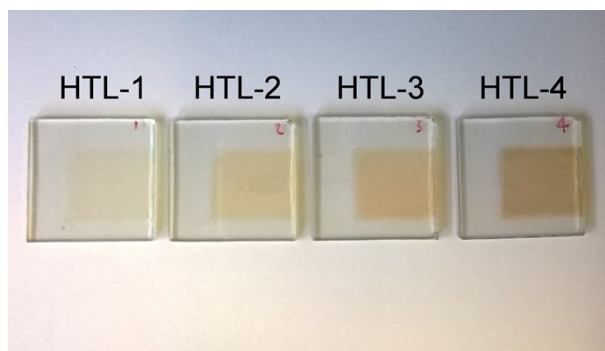

**Figure S1.** Top-view images of HTL-1-4 samples.

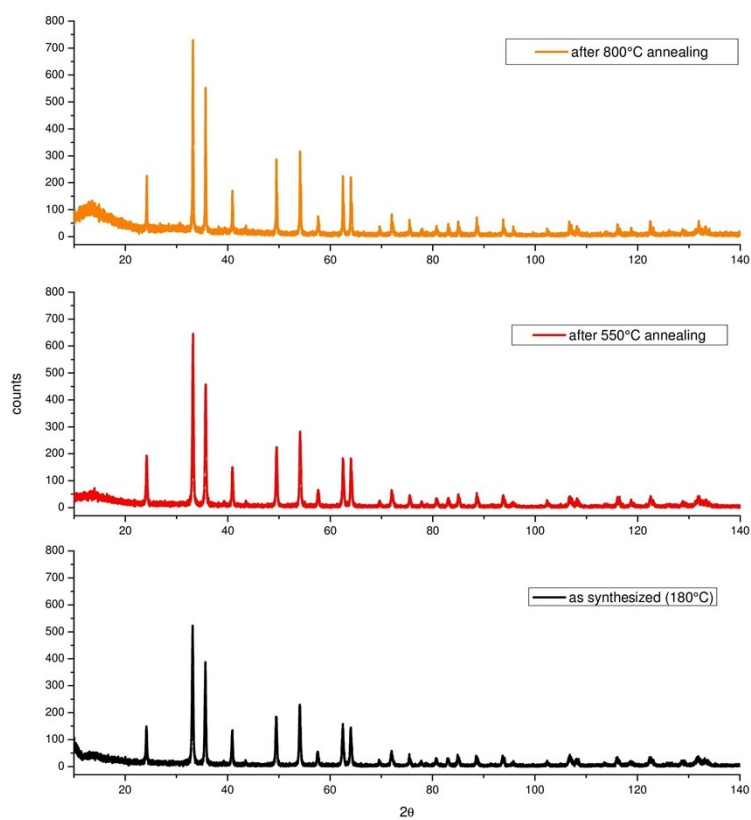

**Figure S2.** XRD of iron oxide powder as synthesized in autoclave at 180°C for 12 hours (black trace), after annealing at 550°C for 2 hours (red traces) and after 800°C treatment for 10 minutes (orange trace).

| Sample | Number of measurements | Average Thickness | Standard Deviation |
|--------|------------------------|-------------------|--------------------|
| 1      | 22                     | 14                | 1.2                |
| 2      | 11                     | 19                | 1.1                |
| 3      | 18                     | 32                | 6.2                |
| 4      | 17                     | 40                | 7.1                |

**Table S1.** Analysis of the reproducibility of the thickness of HTL samples measurement with the cross-section SEM analysis. Measurements were taken at a minimum of 3 and a maximum of 5 different locations along the film section. Outliers have not been discarded when calculating Standard Deviation.

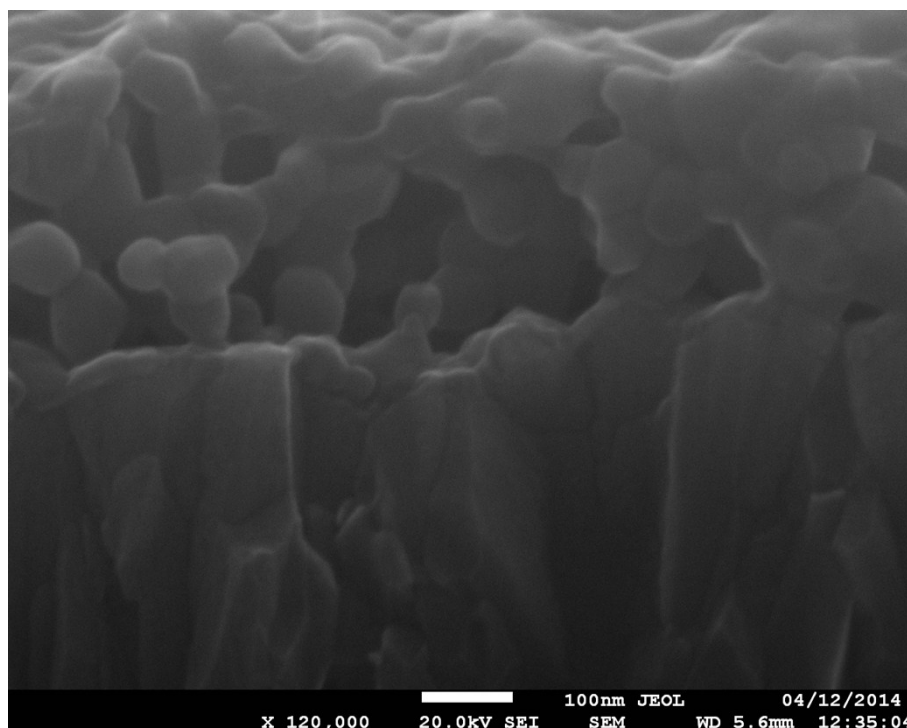

**Figure S3** Cross-sectional SEM image of MPH deposited on HTL-3 and annealed at 800°C.

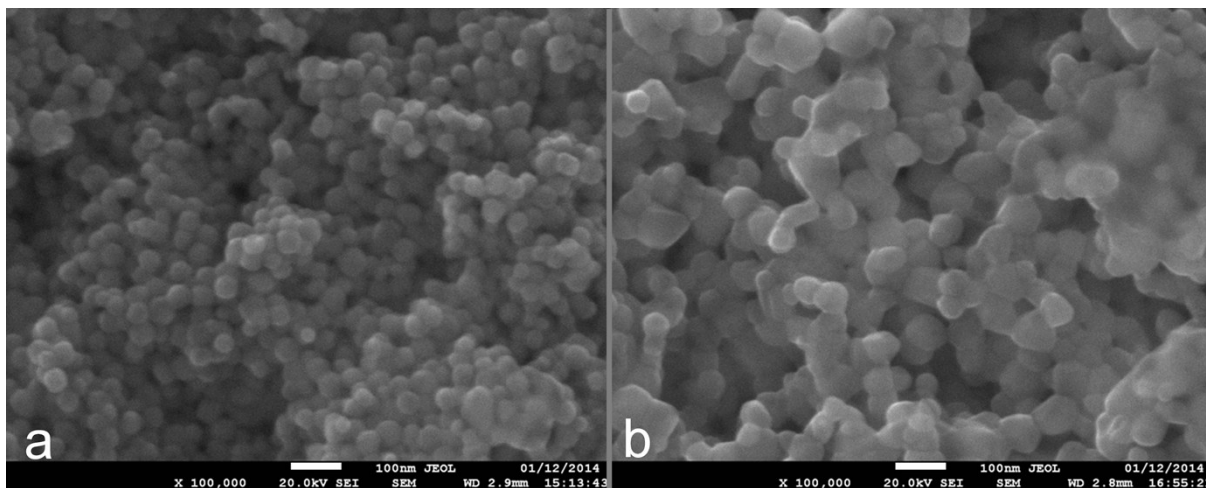

**Figure S4** Top-view SEM images of MPH electrophoretically deposited over FTO and annealed at (a) 550 °C and (b) 800 °C.

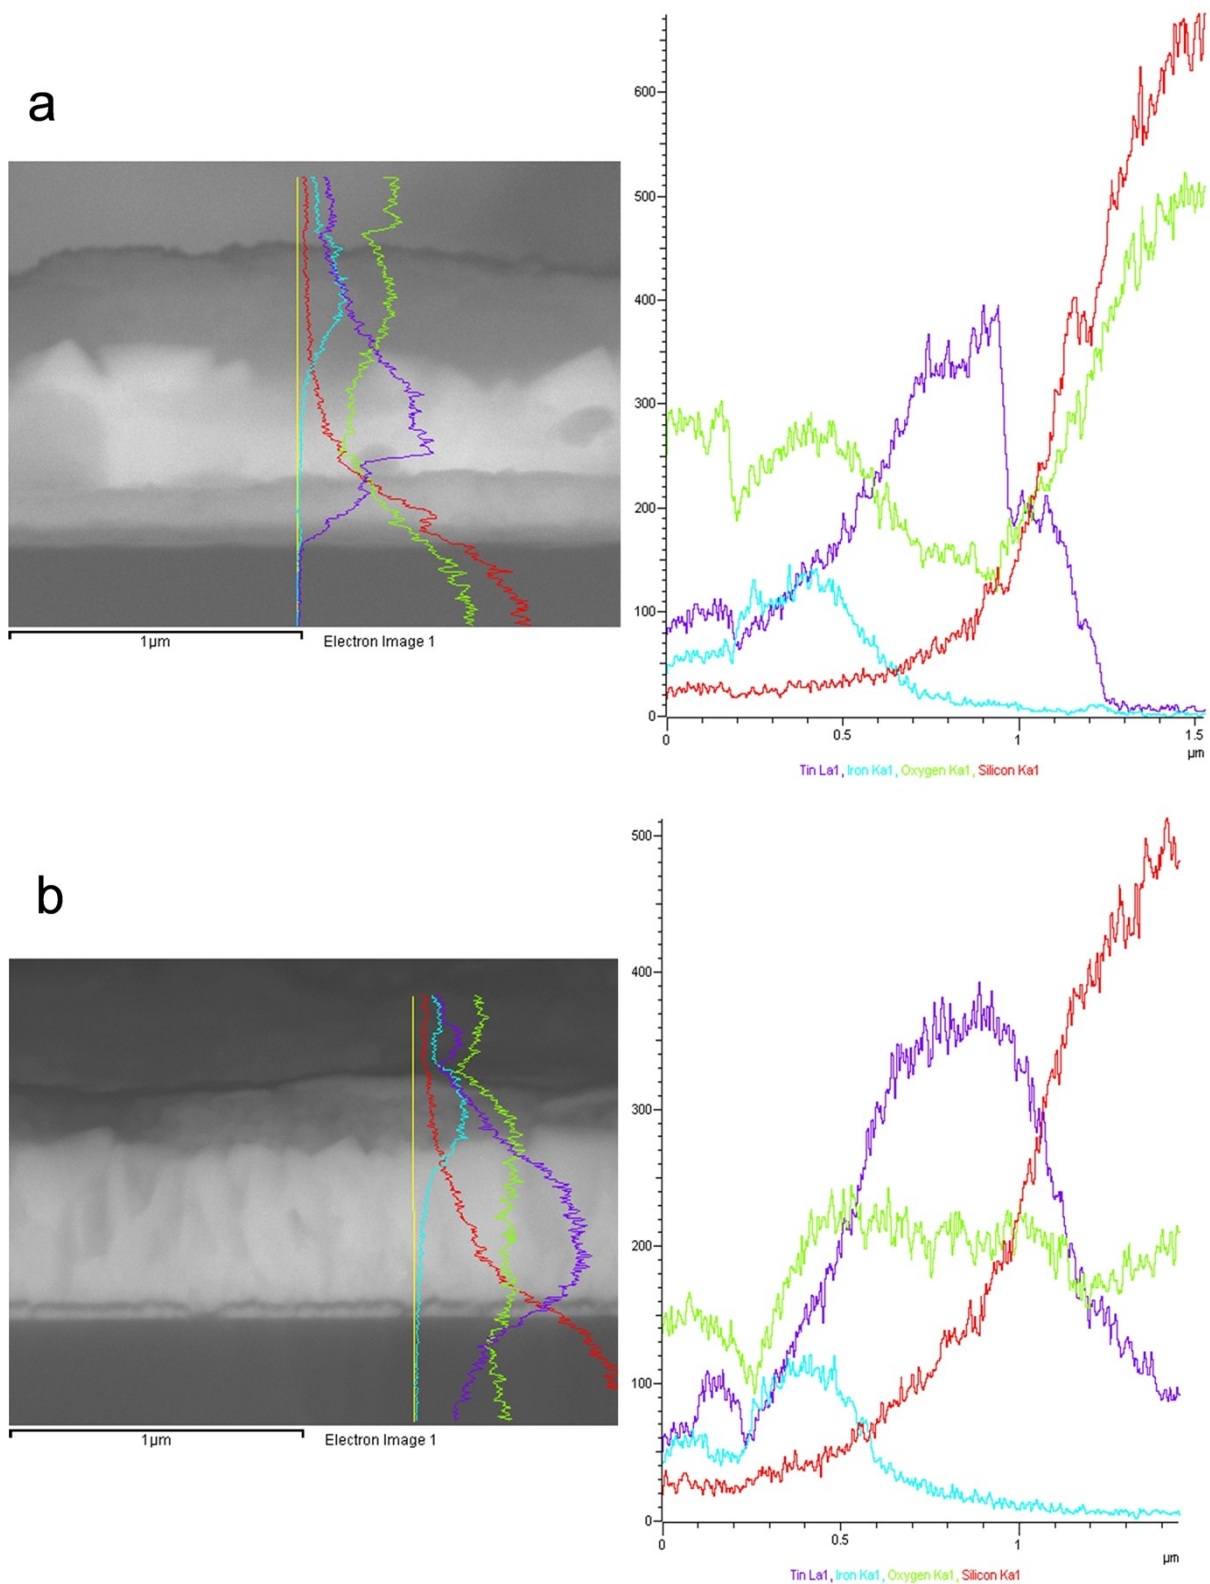

**Figure S5** Cross sectional energy dispersive analysis (EDS) of MPH sample (a) before and (b) after 800°C annealing. The FTO/glass interface can be identified between 0.9 and 1.1  $\mu\text{m}$  and

the hematite/FTO interface between 0.5 and 0.7  $\mu\text{m}$ . The interface air/hematite, the actual surface, lies at about 0.1-0.2  $\mu\text{m}$ .

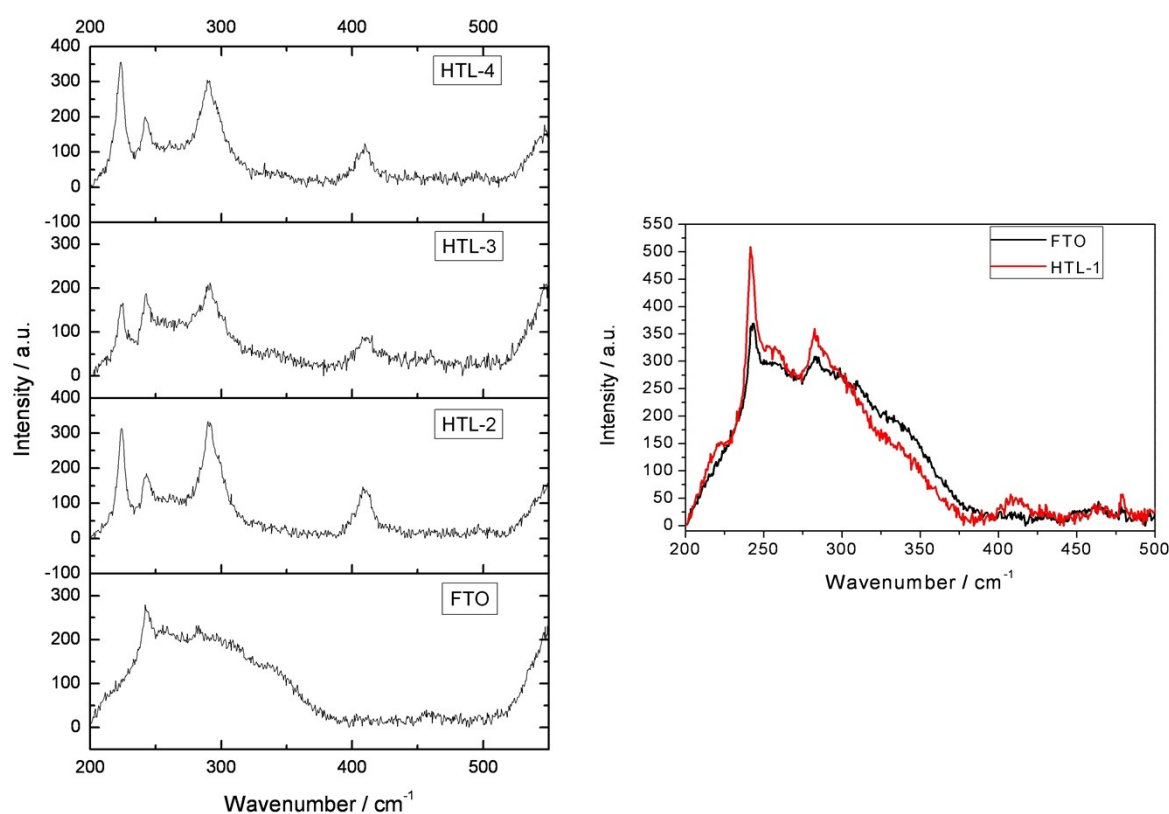

**Figure S6** (left) Micro-Raman spectra of HTL-2-4 samples and bare FTO (shown for reference). (right) Micro-Raman spectra of HTL-1 (red line) and bare FTO (black line). While for MPH samples (Figure 4) the film is thick enough ( $> 300$  nm in all samples) that the FTO contribute to the overall Raman signal is negligible, the spectra for HTL-1-4 show a convolution of the hematite signal with the underlying FTO signal. This is evident in particular for HTL-1 (right), where a clear identification of hematite on the surface is not possible. The diagnostic peaks for the presence of hematite can instead be revealed for HTL-2-4 (left).

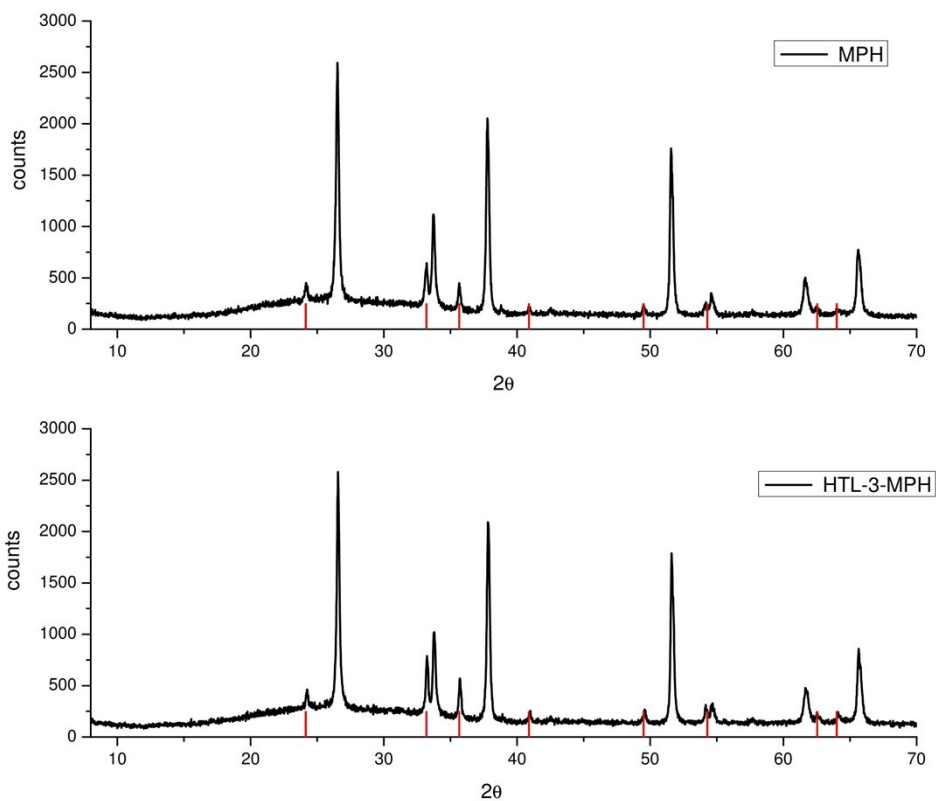

**Figure S7** XRD of MPH and HTL-3-MPH samples after 800°C annealing. Red bars in the diffractograms indicate  $\alpha$ -Fe<sub>2</sub>O<sub>3</sub> signals.

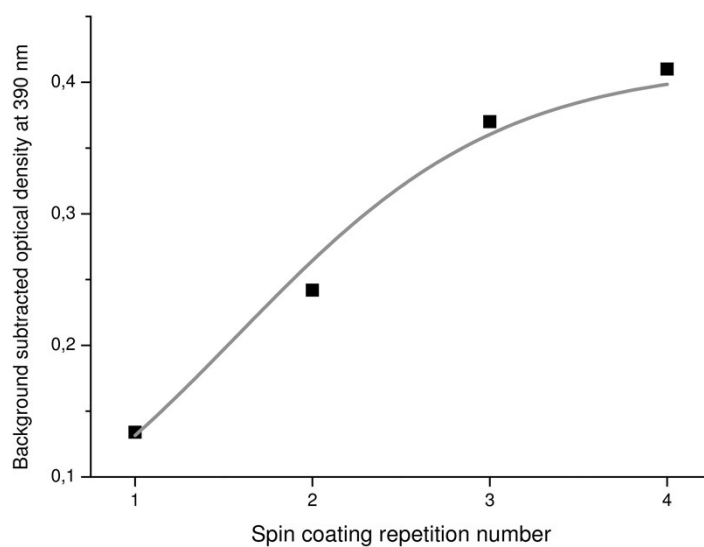

**Figure S8** Plot of the background subtracted absorbance measured at 390 nm versus the number of spin coating runs (1-4) adopted to obtain HTL-1-4 samples.



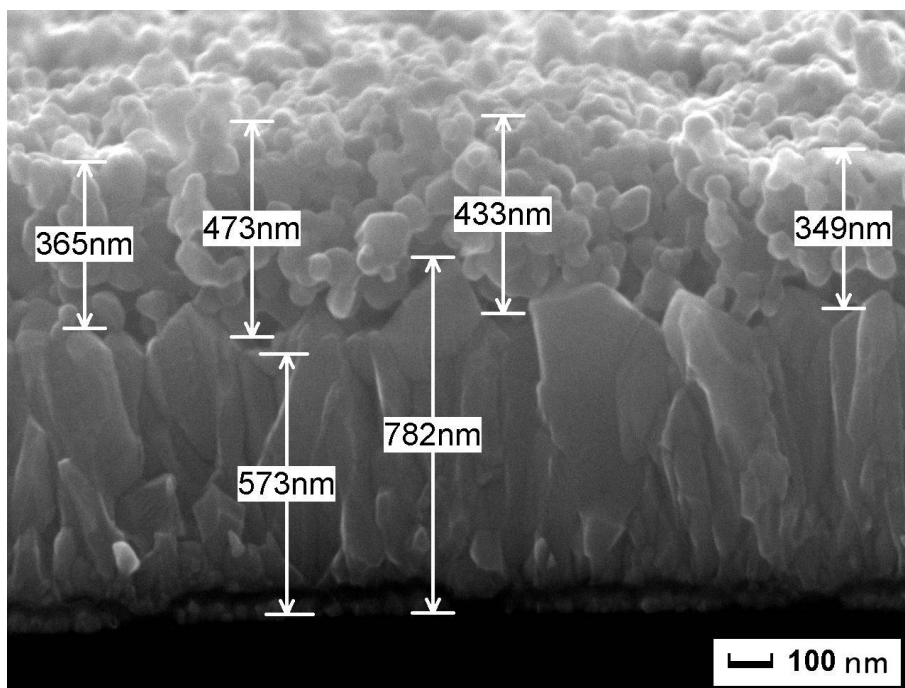

**Figure S9** Cross sectional view of MPH electrophoretically deposited on bare FTO and annealed at 800 °C.

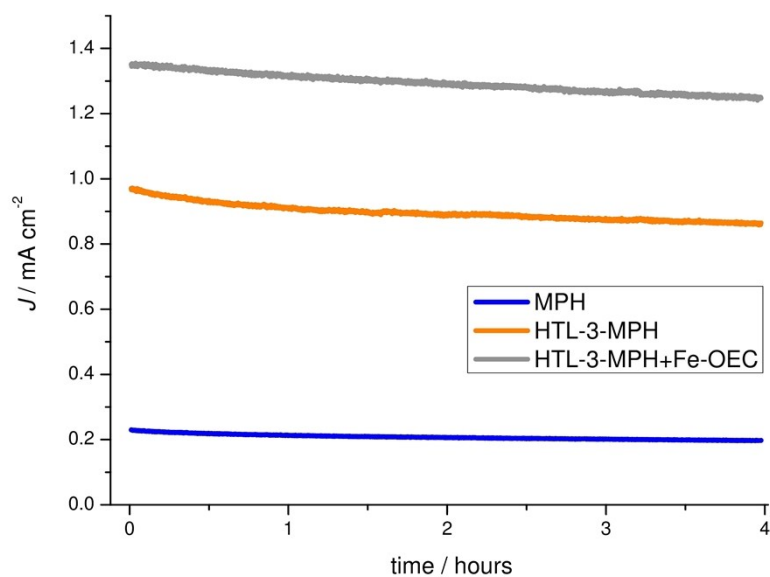

**Figure S10** Chronoamperometry of MPH (blue line), HTL-3-MPH (orange line) and HTL-3-MPH+Fe-OEC (grey line) recorded in NaOH 0.1 M (pH 13.3) under continuous AM 1.5G illumination ( $100 \text{ mW cm}^{-2}$ ) at 0.6 V vs SCE.

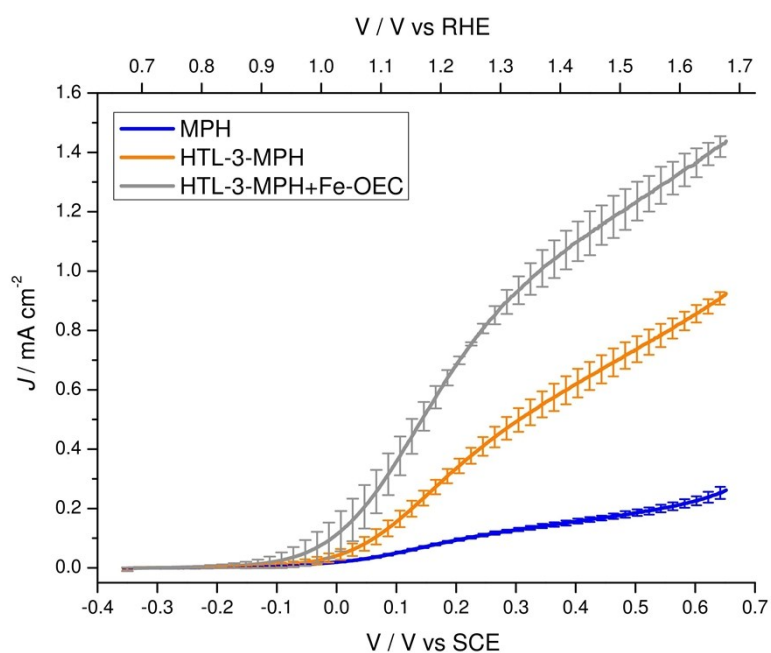

**Figure S11** Average  $J$ - $V$  response with their relative error bars of MPH (blue line), HTL-3-MPH (orange line) and HTL-3-MPH+Fe-OEC (grey line). The  $J$ - $V$  curves reported are mediated over 12 different electrodes and measured in NaOH 0.1 M (pH 13.3) under AM 1.5G illumination ( $100 \text{ mW cm}^{-2}$ ).

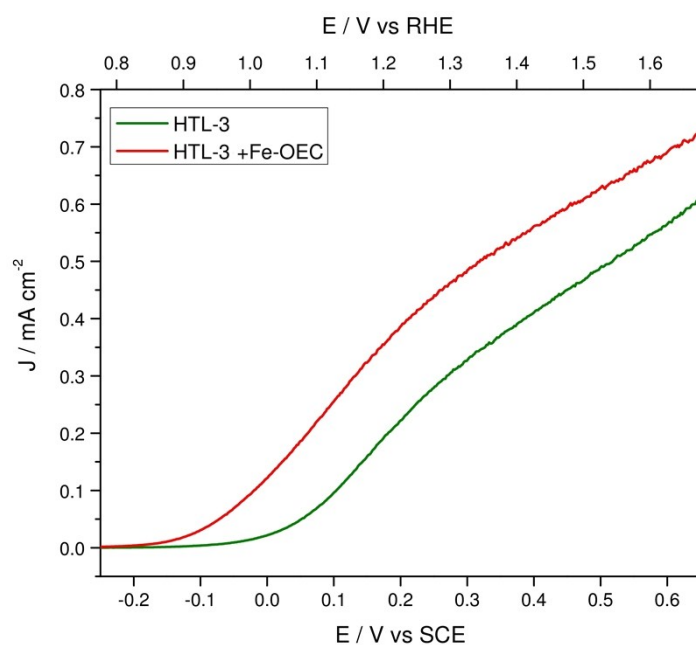

**Figure S12**  $J$ - $V$  curves under continuous illumination ( $100 \text{ mW cm}^{-2}$ , AM 1.5G) of HTL-3 sample before (green line) and after (red line) functionalization with Fe-OEC recorded in NaOH 0.1 M (pH 13.3).

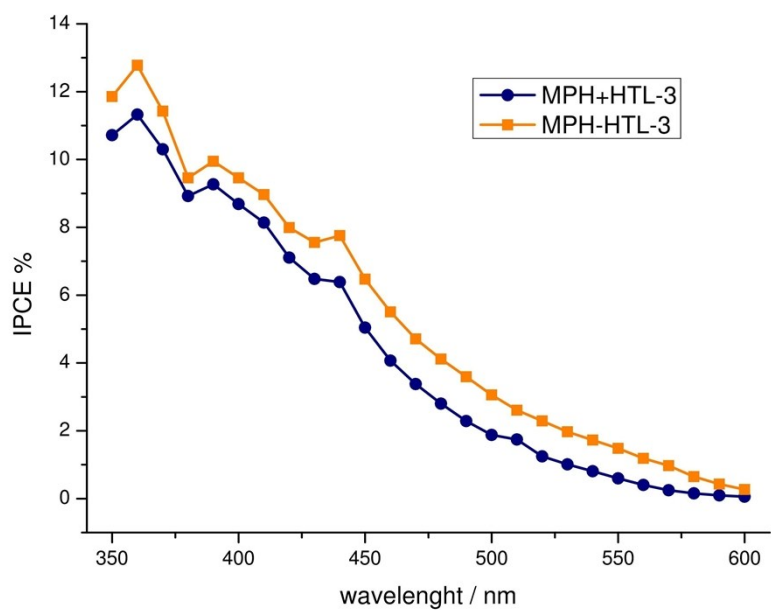

**Figure S13** IPCE spectra of HTL-3-MPH (orange squares) compared to the summed individual contribution of MPH and HTL-3 (navy circles) FTO side illumination at 0.6 V vs SCE in NaOH (0.1 M, pH 13.3).

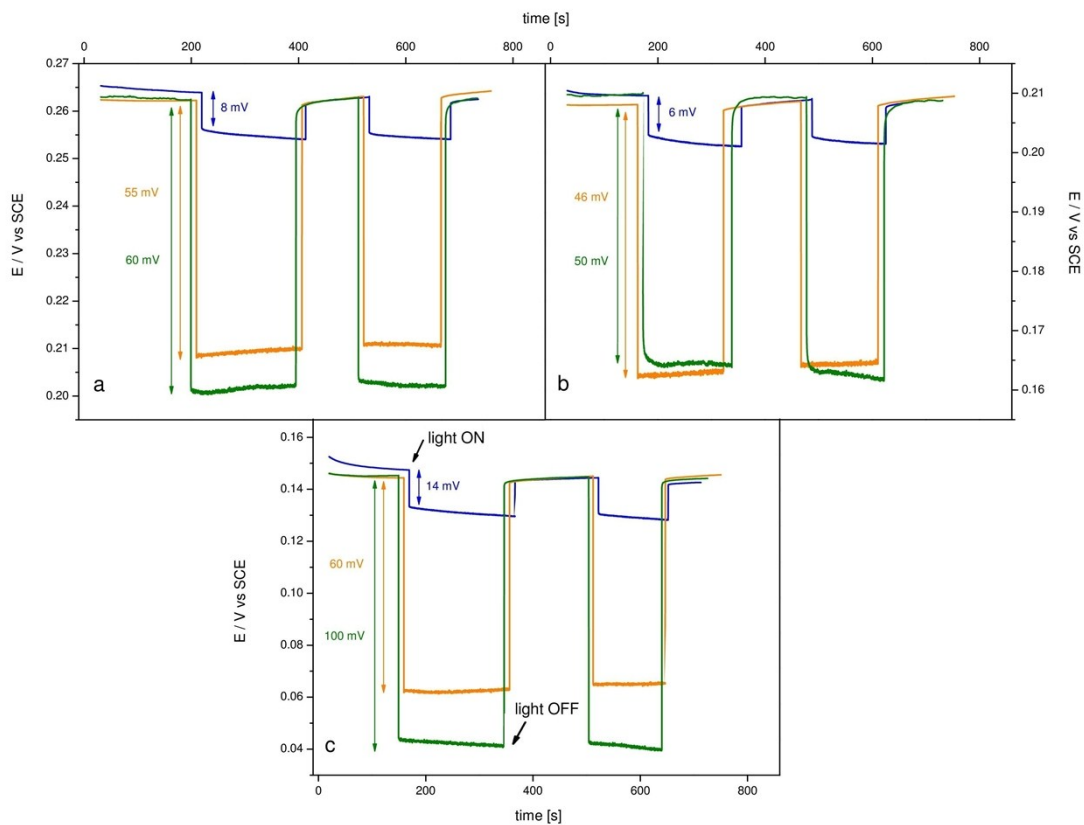

**Figure S14** Photovoltage decays of MPH (blue line), HTL-3 (green line) and HTL-3-MPH (orange line) samples recorded at open circuit condition under shuttered illumination (100 mW cm<sup>-2</sup>, AM 1.5G) in a KOH solution (0.1 M, pH 13.4) of K<sub>4</sub>[Fe(CN)<sub>6</sub>]/K<sub>3</sub>[Fe(CN)<sub>6</sub>] at three different concentrations: (a) 20 mM Fe(II)/200 mM Fe(III); (b) 100 mM Fe(II)/100 mM Fe(III); (c) 200 mM Fe(II)/20 mM Fe(III).

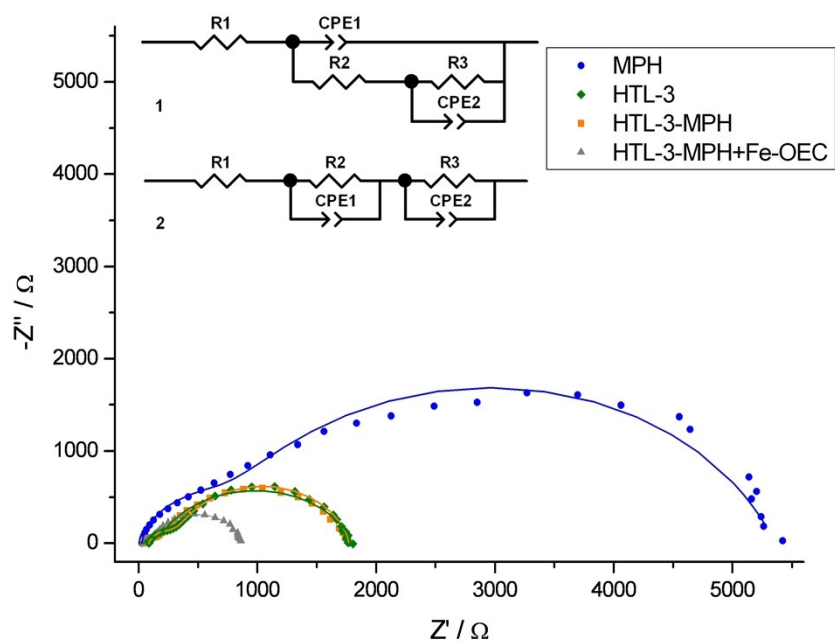

**Figure S15** Nyquist plot (0 V vs SCE) of MPH (blue circles), HTL-3 (green diamonds) and HTL-3-MPH with (grey triangles) and without Fe-OEC (orange squares) recorded under AM 1.5G illumination ( $100 \text{ mW cm}^{-2}$ ) in NaOH (0.1 M, pH 13.3). Equivalent circuits used for fitting EIS data of (1) HTL-3 and HTL-3-MPH with and without Fe-OEC and (2) MPH electrodes are reported.

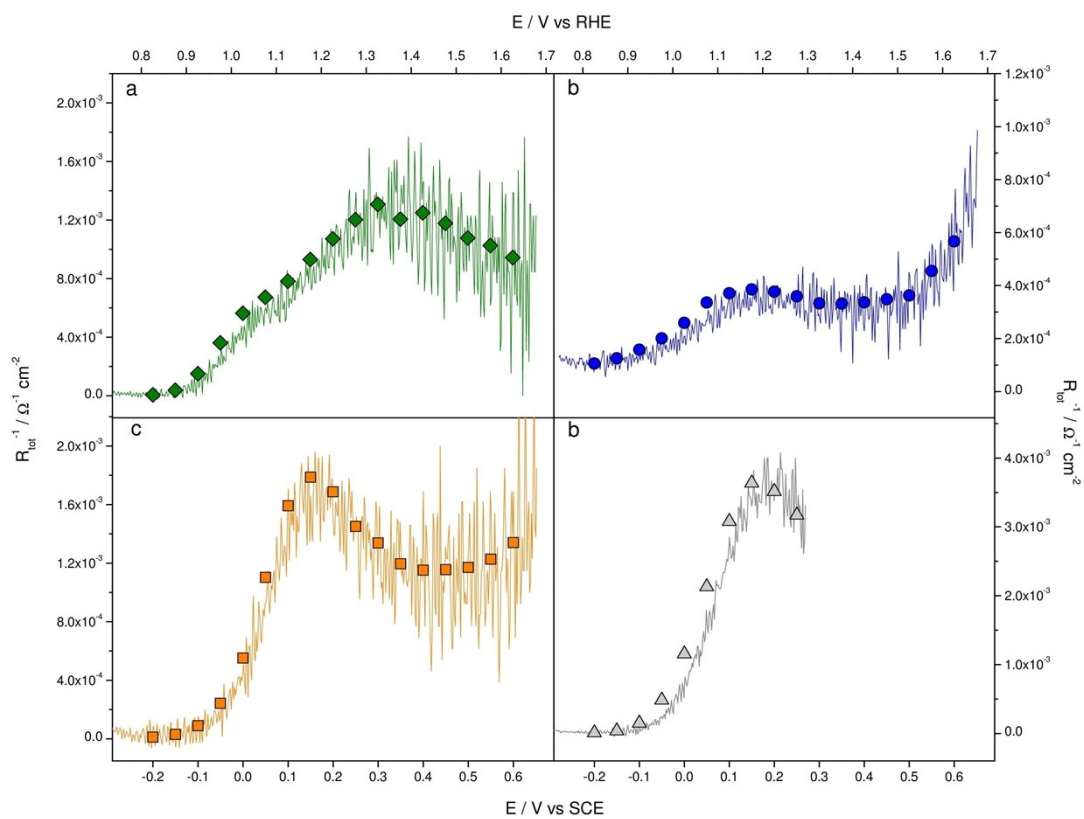

**Figure S16** Derivative of the  $J$ - $V$  curve (lines) compared to  $R_{\text{tot}}^{-1}$  obtained from EIS data (triangles) with models reported in Figure S14 for (a) HTL-3, (b) MPH, (c) HTL-3-MPH and (d) HTL-3-MPH with Fe-OEC samples.

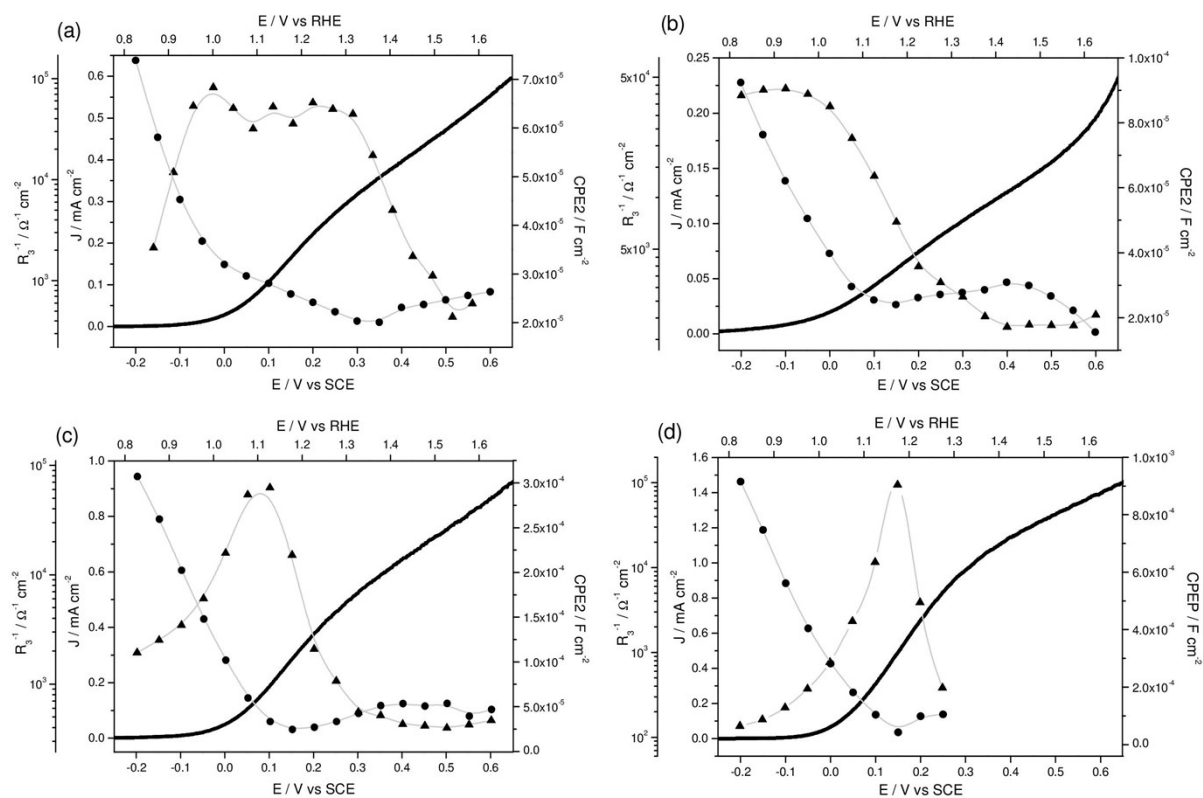

**Figure S17** Plot reporting  $J$ - $V$  curve (solid line),  $R_3$  (circles) and  $CPE_2$  (triangles) values obtained for (a) HTL-3, (b) MPH, (c) HTL-3-MPH and (d) HTL-3-MPH with Fe-OEC under AM 1.5 G illumination ( $100 \text{ mW cm}^{-2}$ ) in NaOH (0.1 M, pH 13.3).

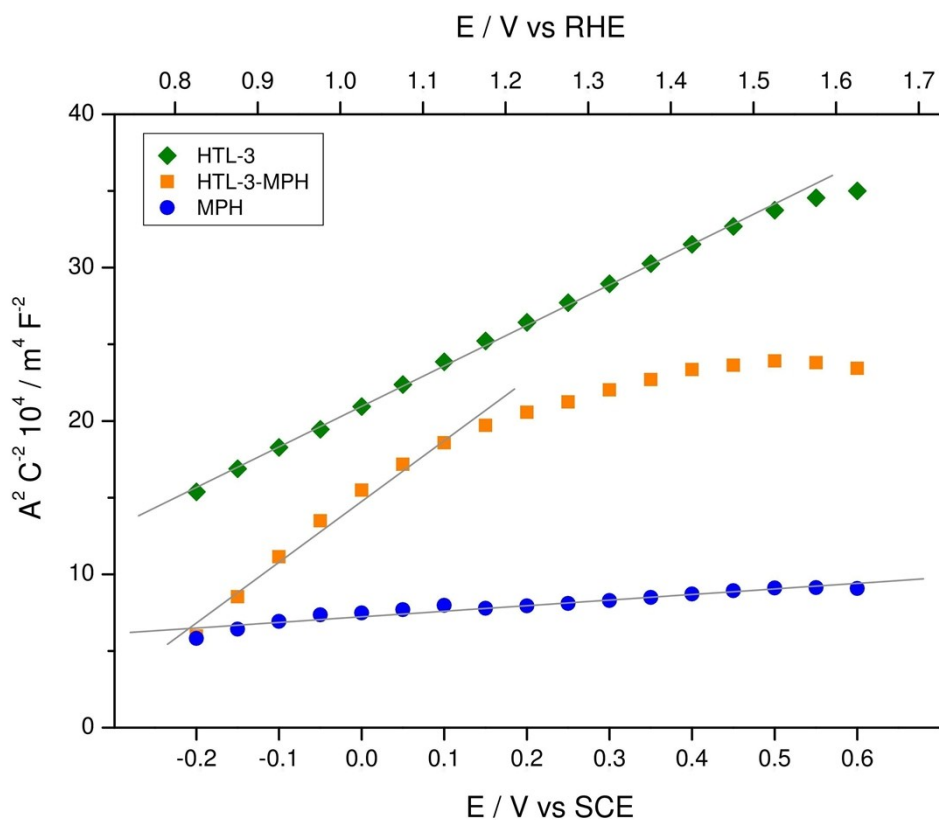

**Figure S18** Mott-Schottky plot of MPH (blue circles), HTL-3 (green diamonds) and HTL-3-MPH (orange squares) recorded in the dark at 1 kHz in NaOH (0.1 M, pH 13.3). For MPH, the MS dependence is ascribed to FTO, whose roughness factor was considered the same as that of HTL (15), given that the latter is essentially conformal to the FTO, and  $\epsilon = 10^1$  in the donor density calculations from MS fitting.



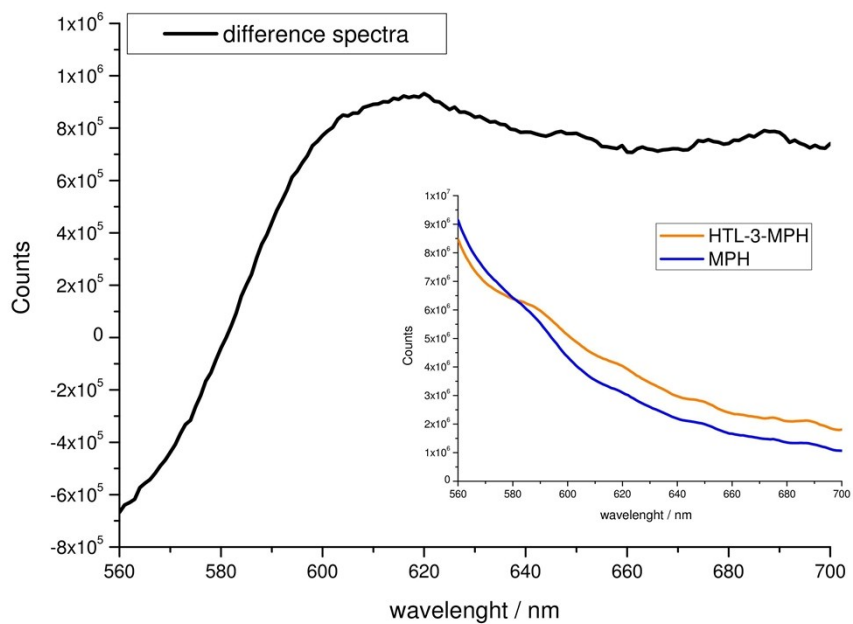

**Figure S19** Difference photoluminescence emission spectra (PL) of HTL-3-MPH and MPH. (Inset) PL spectra (520 nm excitation light) of MPH (blue line) and HTL-3-MPH (orange line).

1. G. Boschloo and D. Fitzmaurice, *J. Phys. Chem. B*, 1999, **103**, 3093.
